# Supplementary material for: Regime Shifts in the Anthropocene: Drivers, Risks, and Resilience
Source: PLOS journal article supplement (doi:10.1371/journal.pone.0134639), 2015-08-12

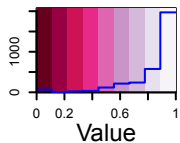

# Management scale

- International
- Regional
- Local

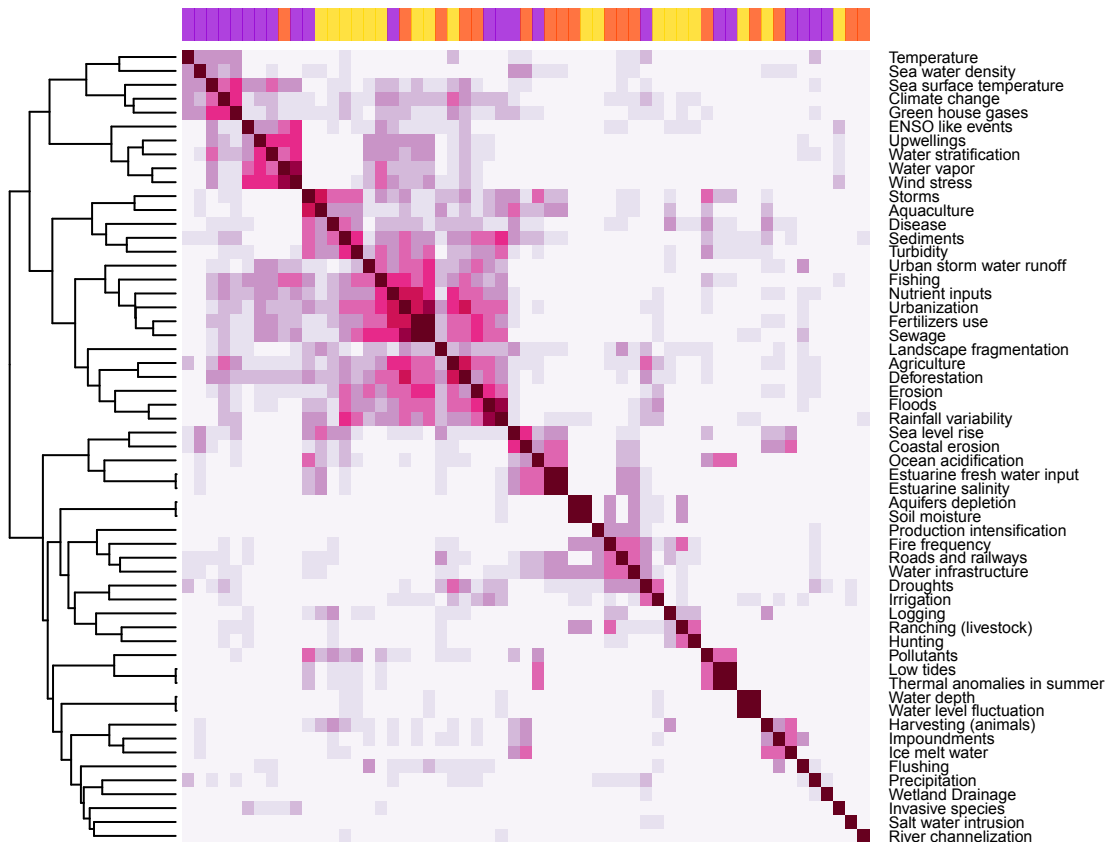

Supplement: S1 (10.1371/journal.pone.0134639.s001) [file journal.pone.0134639.s001]
